# Supplementary material
Source: PubMed Central journal article supplement (PMC3119755)

## Supplemental Figure Legends

Figure 1. Relative expression of TNF $\alpha$  and IL-6 mRNAs in J774 cells treated for 8 h with 100 ng/ml LPS in the absence (J774-UT) or presence of 0.1  $\mu$ g/ml GX sPLA<sub>2</sub> (J774-GX) in lipoprotein-deficient medium. Values are presented relative to control cells treated only with LPS after normalization internally to 18S RNA. \*\*,  $p < 0.01$  compared to control cells treated with LPS.

Figure 2. Relative expression of TNF $\alpha$  and IL-6 mRNAs in J774 cells treated with 10  $\mu$ M arachidonic acid or 10  $\mu$ M lysophosphatidylcholine for 16 h prior to treatment with 100 ng/ml LPS for 8 h as described in the 'Materials and Methods'. Values are normalized internally to 18S RNA.

Supplementary Figure 1

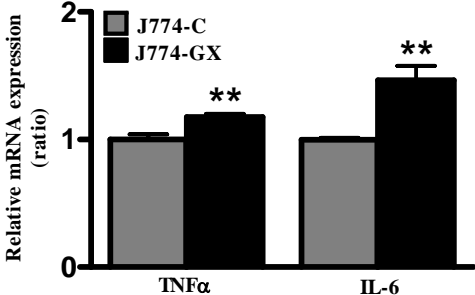

Supplementary Figure 2

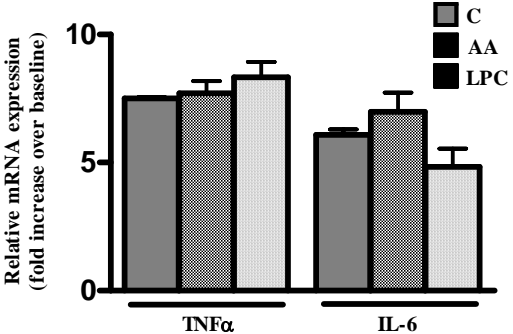

Supplement: NIHMS293215-supplement-1.pdf [file NIHMS293215-supplement-1.pdf]
